# Supplementary material for: Self-assembly nanovaccine containing TLR7/8 agonist and STAT3 inhibitor enhances tumor immunotherapy by augmenting tumor-specific immune response
Source: PubMed Central journal article supplement (PMC8404452; doi:10.1136/jitc-2021-003132), 2021-08-26

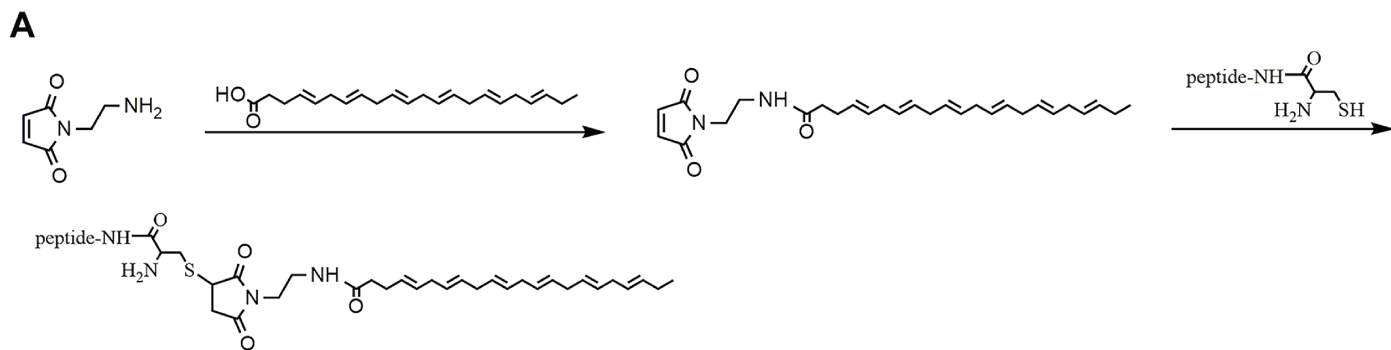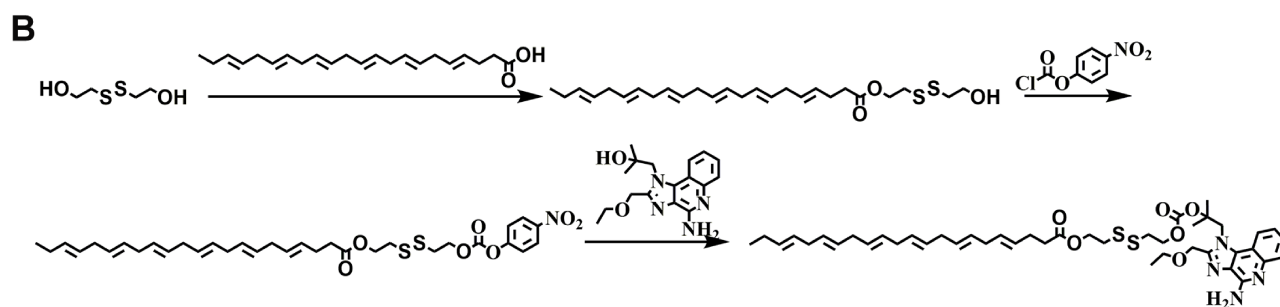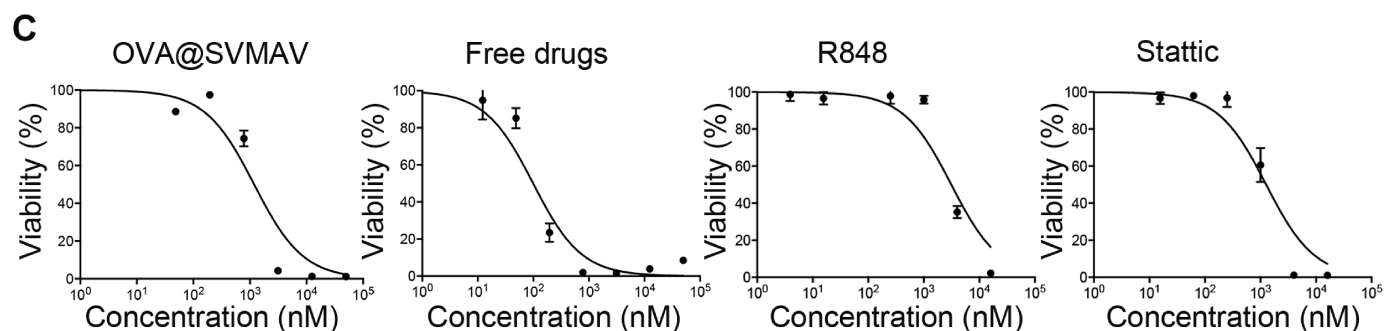

**D**

IC<sub>50</sub> values of different treatment in HEK 293T cells

|                       | OVA@SVMVA | Free drugs | R848 | Stattic |
|-----------------------|-----------|------------|------|---------|
| IC <sub>50</sub> (nM) | 1186      | 99.24      | 3130 | 1265    |

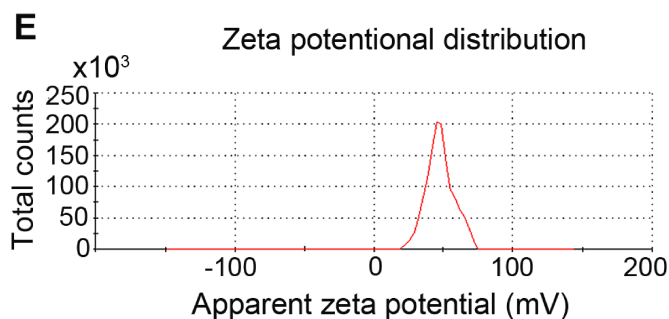

Supplement: jitc-2021-003132supp002.pdf [file jitc-2021-003132supp002.pdf]
