# Supplementary material for: Self-assembly nanovaccine containing TLR7/8 agonist and STAT3 inhibitor enhances tumor immunotherapy by augmenting tumor-specific immune response
Source: PubMed Central journal article supplement (PMC8404452; doi:10.1136/jitc-2021-003132), 2021-08-26

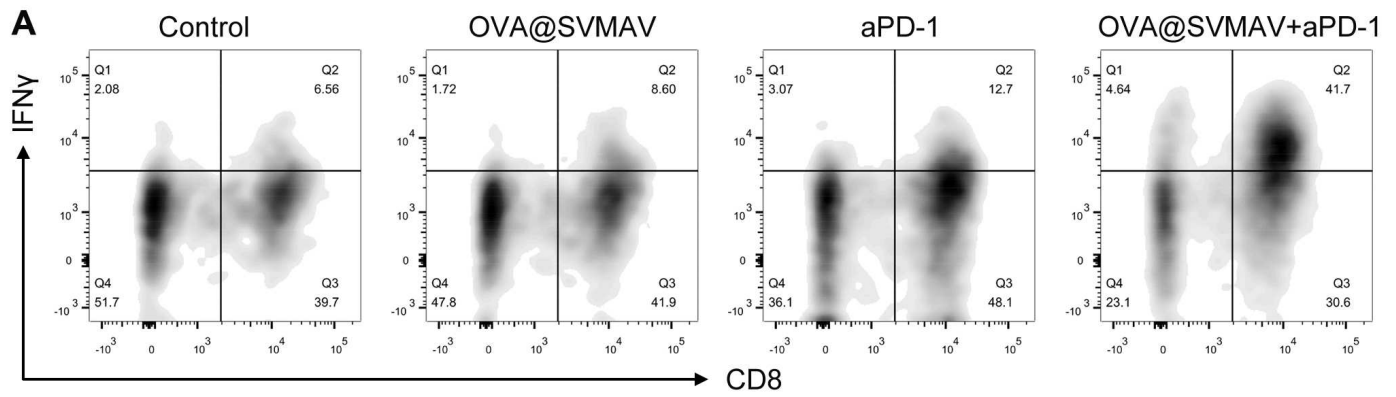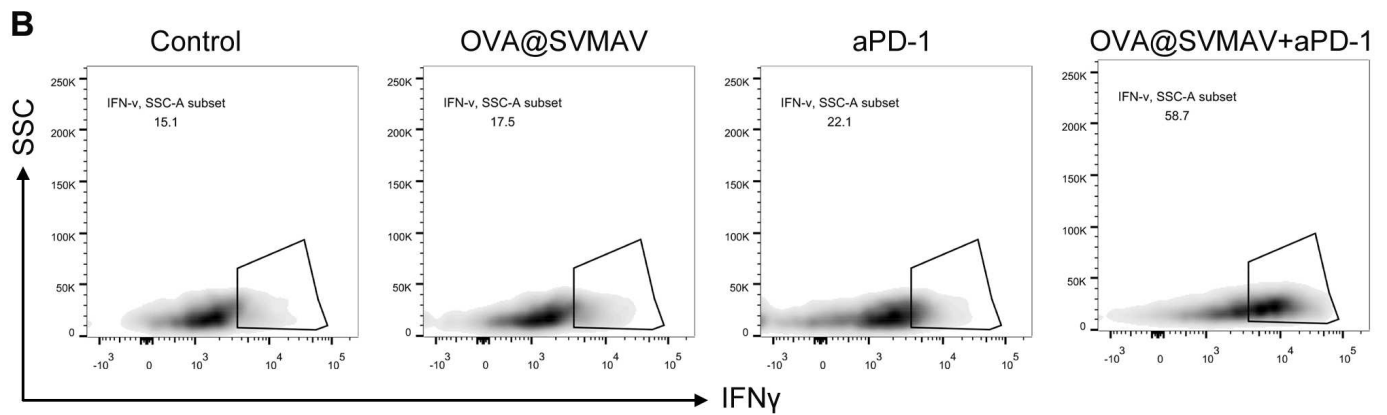

**C** Intratumor infiltration of CD8<sup>+</sup> T cells

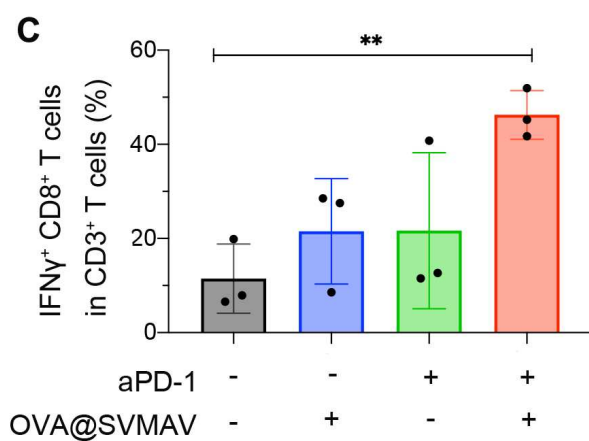

**D** Intratumor infiltration of IFN $\gamma$ <sup>+</sup> CD8<sup>+</sup> T cells

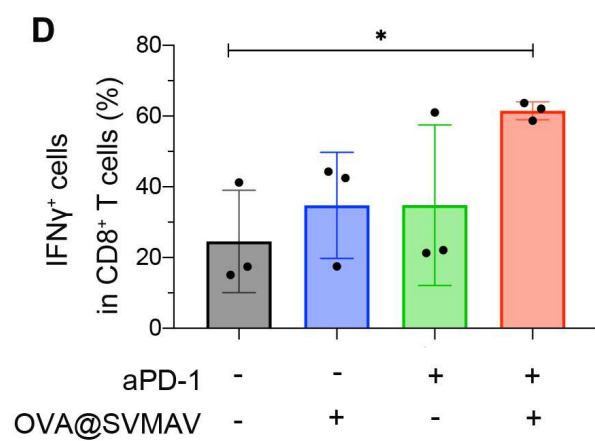

Supplement: jitc-2021-003132supp007.pdf [file jitc-2021-003132supp007.pdf]
