# Supplementary material for: Self-assembly nanovaccine containing TLR7/8 agonist and STAT3 inhibitor enhances tumor immunotherapy by augmenting tumor-specific immune response
Source: PubMed Central journal article supplement (PMC8404452; doi:10.1136/jitc-2021-003132), 2021-08-26
Supplement: jitc-2021-003132supp009.pdf [file jitc-2021-003132supp009.pdf]

## Self-assembly nanovaccine containing TLR7/8 agonist and STAT3 inhibitor enhances tumor immunotherapy by augmenting tumor-specific immune response

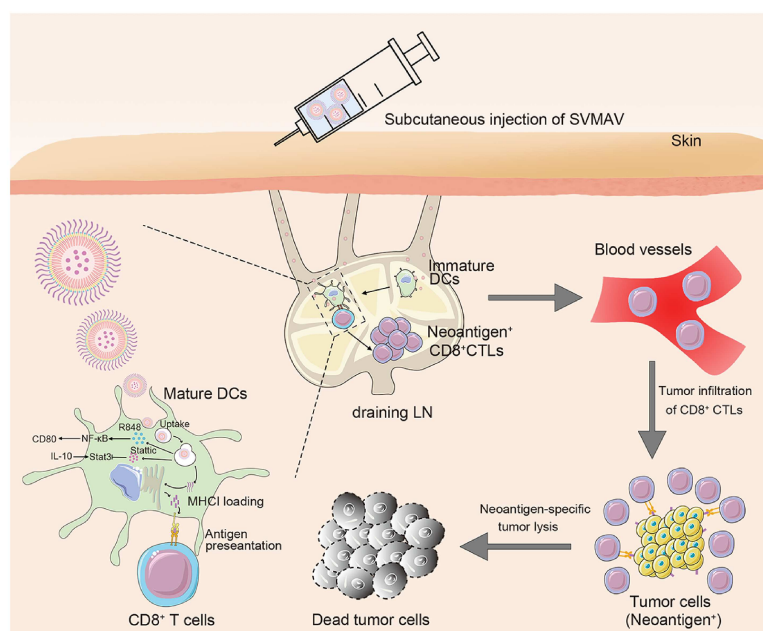

### Authors

Lele Zhang, Jiacheng Huang, Xiaona Chen, Caixu Pan, Yong He, Rong Su, Danjing Guo, Shengyong Yin, Shuai Wang, Lin Zhou, Jianxiang Chen, Shusen Zheng, Yiting Qiao

### Correspondence

yitingqiao@zju.edu.cn; chenjx@hznu.edu.cn; shusenzheng@zju.edu.cn

### In Brief

This work designs a novel cancer nanovaccine named SVMAV, which simultaneously loads antigenic peptides, TLR7/8 agonist R848 and STAT3 inhibitor stattic.

SVMAV possesses abilities of facilitating DC maturation, enhancing antigen cross-presentation and activating T cells. It also exhibits excellent therapeutic and preventive effect against tumors and metastasis. SVMAV is a potential platform for personalized neoantigen-based cancer vaccines.
